# Supplementary material
Source: PubMed Central journal article supplement (PMC4255559)
Supplement: NIHMS492730-supplement-Supp_Figs.pdf [file NIHMS492730-supplement-Supp_Figs.pdf]

**Supplementary Fig. S1.**

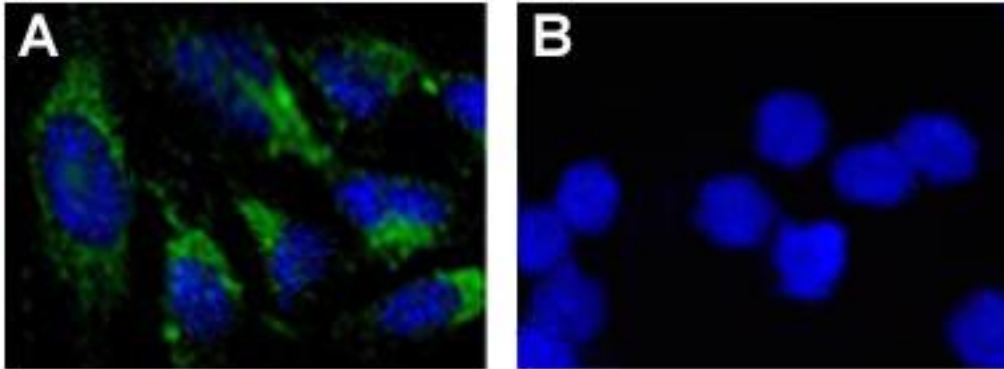

Immunofluorescence assay with antibody against CD133 on the sorted ALDH1-positive and -negative cancer cells. The ALDH1-positive cells (A) had strong immunoreactivity for CD133 compared with the ALDH1-negative cells (B), suggesting that ALDH1-positive cells derived from lung cancer cells were enriched in CSCs. The immunofluorescence assay was done on all cell lines and repeated three times, respectively. The figure only shows the results from H358 cells.

Supplementary Fig. S2.

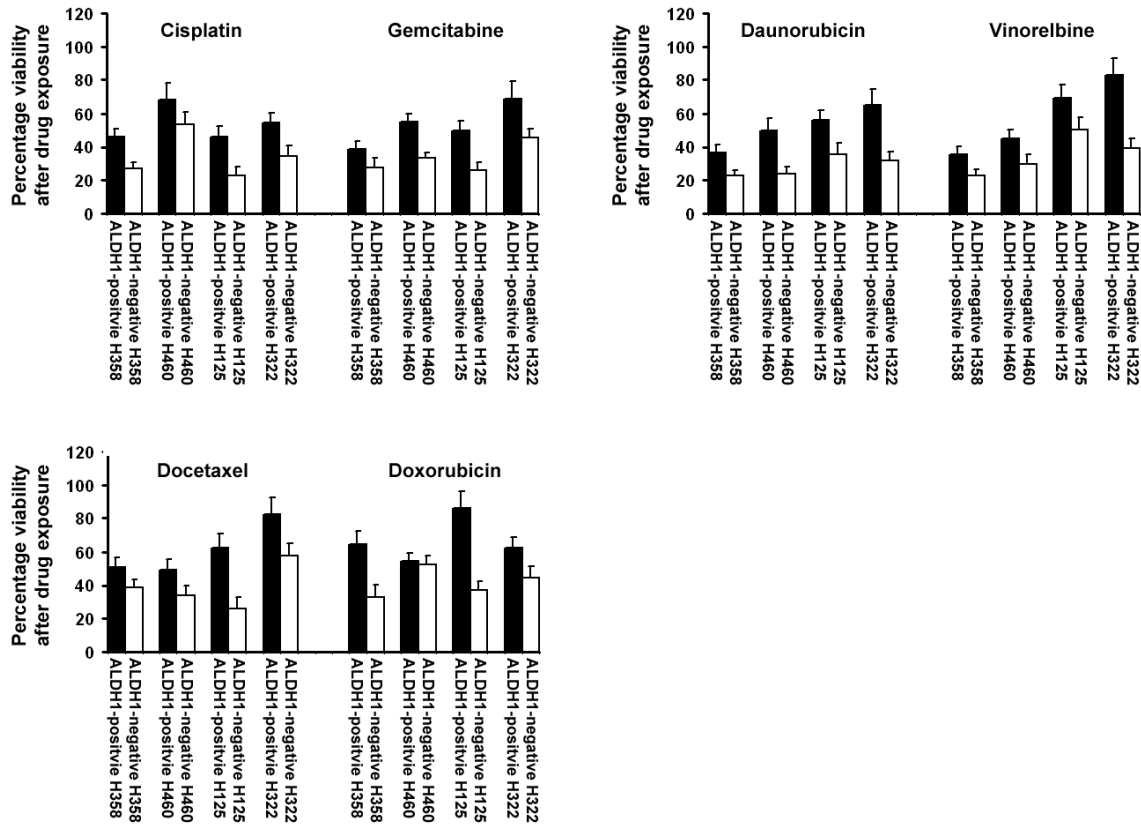

Chemotherapeutic resistant analysis. The ALDH1-positive cells displayed greater resistance to the chemotherapeutic drugs than the ALDH1-negative cells did, suggesting that ALDH1-positive cells represent lung CSCs had important feature of CSCs. Resistance was quantified as percentage viability after drug exposure for 24 hours. Each experiment was repeated three times. Each data point represented the mean values from three independent experiments.
